# Supplementary material for: Two new oxyiodoplumbates: the unique 3-D hybrid oxyiodoplumbate based on neutral 2-D [Pb2I4]nlayers
Source: Royal Society of Chemistry journal article supplement (doi:10.1039/c8dt01927d), 2018-01-01
Supplement: c8dt01927d1.pdf [file c8dt01927d1.pdf]

Supporting Information

**Two new oxyiodoplumbates: the unique 3-D hybrid oxyiodo-plumbate based on  
neutral 2-D  $[\text{Pb}_2\text{I}_4]_n$  layers**

Hong Xiao, Jian Zhou and Feilong Hu

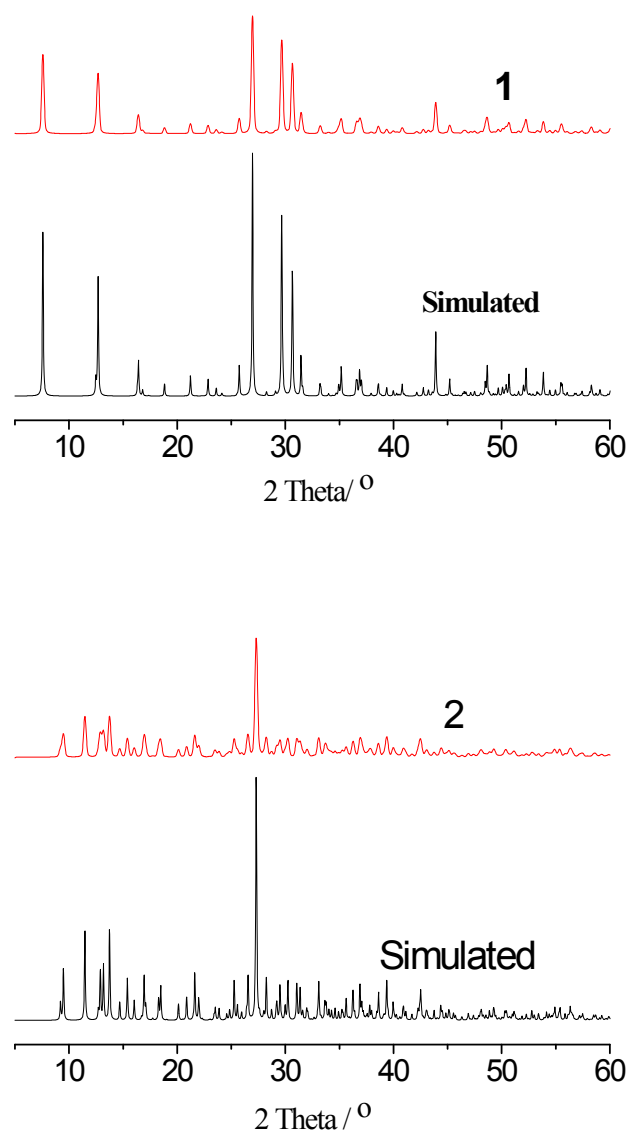

Fig. S1 Simulated and experimental powder XRD patterns of **1** and **2**.

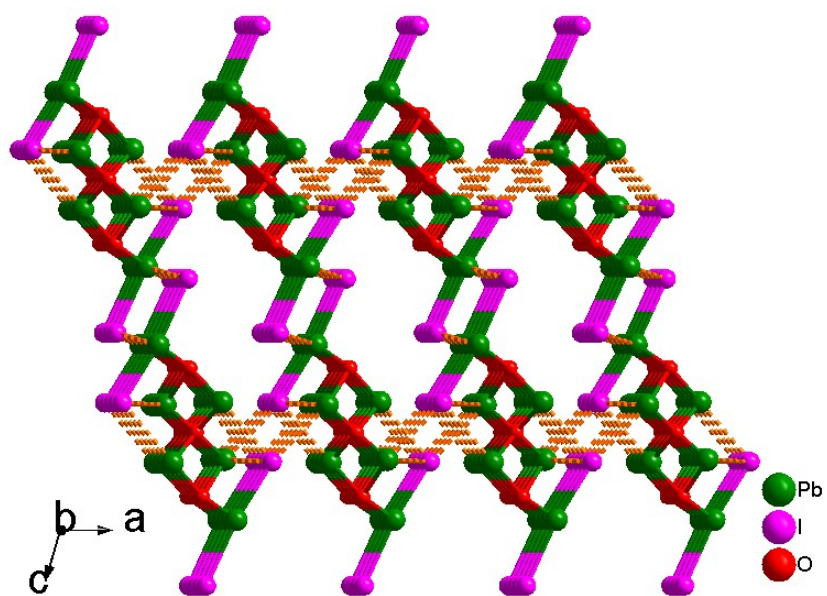

Fig. S2 3-D supramolecular network structure in **1**.

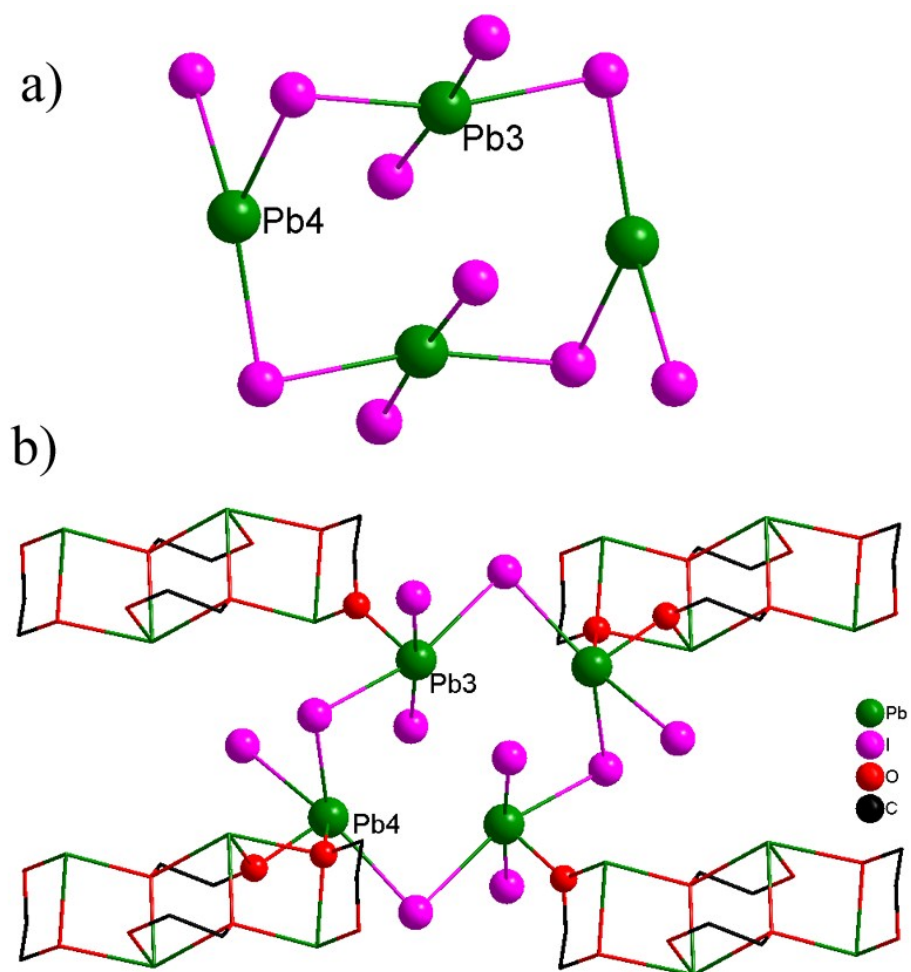

Fig. S3 (a)  $[\text{Pb}_4\text{I}_{10}]$  cluster in **2**, (b) each  $[\text{Pb}_4\text{I}_{10}]$  cluster linking with four tetra-nuclear  $[\text{Pb}_4\text{L}_4]$  complexes.
